# Supplementary material for: Supercritical CO2 Plant Extracts Show Antifungal Activities against Crop-Borne Fungi
Source: MDPI journal article supplement (doi:10.3390/molecules27031132), 2022-02-08
Supplement: s1 [file s1]

Supplement for the Article

# Supercritical CO<sub>2</sub> Plant Extracts Show Antifungal Activities against Crop-Borne Fungi

Katja Schoss<sup>1</sup>, Nina Kočevlar Glavač<sup>1</sup>, Jasna Dolenc Koce<sup>2\*</sup>, Sabina Anžlovar<sup>2</sup>

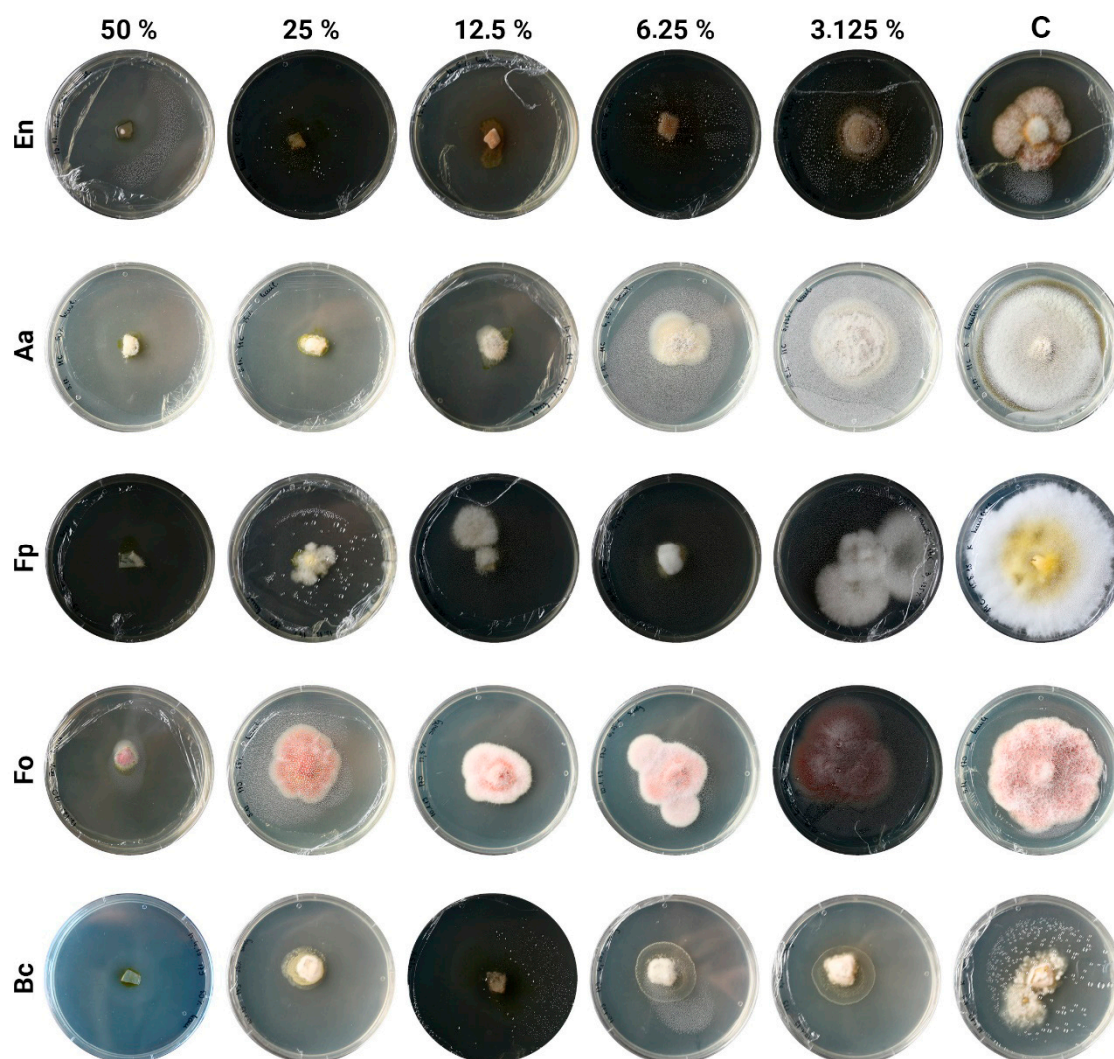

**Figure S1.** Concentration-dependent fungal growth after treatments with chamomile SFE-CO<sub>2</sub> extracts and control (C). Fungal strains are indicated with letters: En – *E. nigrum*, Aa – *A. alternata*, Fp – *F. poae*, Fo – *F. oxysporum*, Bc – *B. cinerea*.

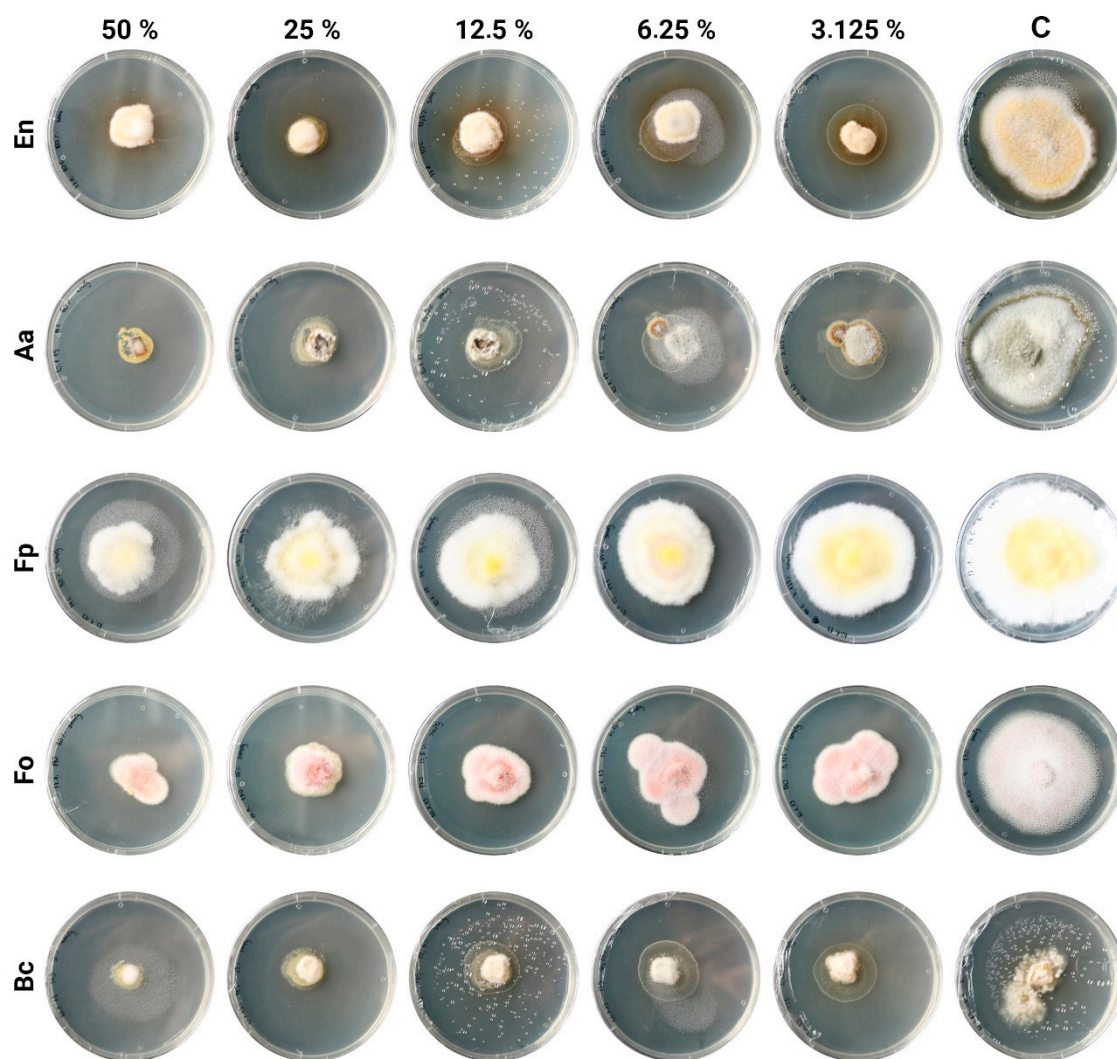

**Figure S2.** Concentration-dependent fungal growth after treatments with sandy everlasting SFE-CO<sub>2</sub> extracts and control (C). Fungal strains are indicated with letters: En – *E. nigrum*, Aa – *A. alternata*, Fp – *F. poae*, Fo – *F. oxysporum*, Bc – *B. cinerea*.
